# Supplementary material for: Adjusting working conditions and evaluating the risk of infection during the COVID-19 pandemic in different workplace settings in Germany: a study protocol for an explorative modular mixed methods approach
Source: PubMed Central journal article supplement — BMJ Open. 2020 Nov 18;10(11):e043908. doi: 10.1136/bmjopen-2020-043908 (PMC7677339; doi:10.1136/bmjopen-2020-043908), 2020-11-18
Supplement: bmjopen-2020-043908supp001.pdf [file bmjopen-2020-043908supp001.pdf]

### Supplementary file S1 - Good Reporting of A Mixed Methods Study (GRAMMS) checklist\*

| <b>Guideline</b>                                                                            | <b>Section</b>                                                                                                                                                                                                                                           |
|---------------------------------------------------------------------------------------------|----------------------------------------------------------------------------------------------------------------------------------------------------------------------------------------------------------------------------------------------------------|
| Describe the justification for using a mixed methods approach to the research question      | METHODS AND ANALYSIS - study design and figure 1                                                                                                                                                                                                         |
| Describe the design in terms of the purpose, priority and sequence of methods               | METHODS AND ANALYSIS - study duration, figure 1, table 1                                                                                                                                                                                                 |
| Describe each method in terms of sampling, data collection and analysis                     | METHODS AND ANALYSIS - study procedures                                                                                                                                                                                                                  |
| Describe where integration has occurred, how it has occurred and who has participated in it | METHODS AND ANALYSIS - study design, figure 1 and discussion. We describe and discuss how we expect data integration to proceed. Describing specific insights is not yet applicable as data collection, analysis and integration has not commenced.      |
| Describe any limitation of one method associated with the present of the other method       | Discussion                                                                                                                                                                                                                                               |
| Describe any insights gained from mixing or integrating methods                             | METHODS AND ANALYSIS - study design and figure 1 where we describe what we expect from applying a mixed method design. Describing specific insights is not yet applicable as data analysis, data collection, analysis and integration has not commenced. |

\*O'Cathain A, Murphy E, Nicholl J. The quality of mixed methods studies in health services research. *J Health Serv Res Policy*. 2008;13: 92-98.
